# Supplementary material
Source: PubMed Central journal article supplement (PMC6117200)
Supplement: NIHMS978358-supplement-supplement_1.pdf [file NIHMS978358-supplement-supplement_1.pdf]

(n=3) tumors that were processed as FF and FFPE samples. The inset shows the numbers of non-synonymous mutations identified in individual MEG samples from mice treated at the specified dosages. (B) Venn diagram of the total numbers of non-synonymous mutations identified uniquely in the FF or FFPE samples and in both FF and FFPE samples for Spontaneous, GBE and MEG sets of tumors at higher ( $\geq 0.1$ ) or lower ( $< 0.1$ ) alternate allele frequency. The concordance was calculated as a percentage of FF mutations that were also identified in the FFPE samples.

Figure 3. Analysis of mutational spectra of spontaneous tumors and tumors from mice treated with GBE or MEG. (A) The spectra of mutations based on the trinucleotide content (one nucleotide before to one nucleotide after the mutation). (B) Hierarchical clustering based on the Kullback-Leibler distance method after accounting for the differences in the trinucleotide composition of the human and mouse genomes. The six sets of samples were classified together with 30 “signatures” from COSMIC database

Supplementary Table 1. Number of exome reads and aligned reads for individual hepatocellular carcinoma samples

Supplementary Table 2. Comparison of results for Sanger sequencing and exome sequencing of known cancer genes

Supplementary Table 3. Novel mutations in cancer-related genes

Supplementary Table 4. Numbers of tumor versus normal variant calls for individual hepatocellular carcinoma samples

Supplementary Table 5. Sanger sequencing of variants of Braf and Bves that were identified by exome sequencing

Supplementary Table 6 -The corresponding mutation counts for each tumor type (Fresh frozen (FF-a) and formalin fixed paraffin embedded (FFPE-b)) that correspond to supplemental figure 2a and 2b, respectively.

Supplementary Table 7 - Mutation signatures in B6C3F1/N mouse hepatocellular carcinomas described within the trinucleotide context of the human exome.

Supplementary Figure 1-Depth of coverage for FF and FFPE samples

Supplementary figure 2 (A and B) - Mutation spectra for the fresh frozen (FF-2a) and formalin fixed paraffin embedded (FFPE-2b) hepatocellular carcinomas arising spontaneously or due to exposure to ginkgo biloba extract or methyleugenol. The corresponding mutation counts for each tumor type (fresh frozen (FF) and formalin fixed paraffin embedded (FFPE)) are indicated in Supplementary table 6 (a and b).

**Supplementary Table 1. Number of exome reads and aligned reads for individual hepatocellular carcinoma samples**

| Treatment         | Dose (mg/kg) | Preparation method | Tissue ID     | Total sequenced reads | #aligned reads | %aligned reads |
|-------------------|--------------|--------------------|---------------|-----------------------|----------------|----------------|
| Normal-1          | 0            | FF                 | VF268/SO2528  | 99,909,430            | 97,705,650     | 97.79%         |
|                   |              | FFPE               | 9882762       | 134,489,342           | 130,906,095    | 97.34%         |
| Normal-2          | 0            | FF                 | VF279/SO2522  | 74,729,280            | 73,085,061     | 97.80%         |
|                   |              | FFPE               | 9882767       | 144,379,422           | 136,726,125    | 94.70%         |
| Normal-3          | 0            | FF                 | VF280/SO2523  | 89,447,206            | 87,031,198     | 97.30%         |
|                   |              | FFPE               | 9882768       | 122,254,168           | 117,468,216    | 96.09%         |
| Spontaneous HCC-1 | 0            | FF                 | VF202/BC15616 | 88,546,480            | 86,676,465     | 97.89%         |
|                   |              | FFPE               | 700304        | 102,987,284           | 99,554,579     | 96.67%         |
| Spontaneous HCC-2 | 0            | FF                 | VF245/BC15585 | 80,122,034            | 78,341,949     | 97.78%         |
|                   |              | FFPE               | 700347        | 150,007,584           | 144,112,680    | 96.07%         |
| Spontaneous HCC-3 | 0            | FF                 | VM8/BC1832    | 85,722,446            | 83,277,690     | 97.15%         |
|                   |              | FFPE               | 9504548       | 133,591,894           | 126,845,412    | 94.95%         |
| GBE-HCC-1         | 2000         | FF                 | M175/BC15578  | 108,394,852           | 105,893,609    | 97.69%         |
|                   |              | FFPE               | 700277        | 142,962,030           | 138,506,289    | 96.88%         |
| GBE-HCC-2         | 2000         | FF                 | M181/BC15563  | 94,837,604            | 92,776,192     | 97.83%         |
|                   |              | FFPE               | 700283        | 137,617,250           | 133,795,509    | 97.22%         |
| GBE-HCC-3         | 2000         | FF                 | F398/BC15605  | 97,423,454            | 94,357,457     | 96.85%         |
|                   |              | FFPE               | 700500        | 133,073,826           | 128,536,848    | 96.59%         |
| GBE-HCC-4         | 2000         | FF                 | F382/BC15624  | 92,511,592            | 87,754,207     | 94.86%         |
|                   |              | FFPE               | 700484        | 154,709,004           | 148,999,350    | 96.31%         |
| MEG-HCC-1         | 37           | FF                 | M64/BC1867    | 90,947,190            | 87,932,423     | 96.69%         |
|                   |              | FFPE               | 9504604       | 133,520,148           | 128,920,206    | 96.55%         |
| MEG-HCC-2         | 75           | FF                 | M129/BC1834   | 88,163,948            | 85,982,190     | 97.53%         |
|                   |              | FFPE               | 9504669       | 138,456,470           | 133,507,288    | 96.43%         |
| MEG-HCC-3         | 150          | FF                 | M196/BC1885   | 90,509,450            | 88,169,757     | 97.41%         |
|                   |              | FFPE               | 9504736       | 138,827,804           | 131,873,116    | 94.99%         |

**Supplementary Table 2. Comparison of results for Sanger sequencing and exome sequencing of known cancer genes**

| Treatment          | FF-Tissue ID  | FFPE-Tissue ID | Gene        | Variants identified by Sanger sequencing of FF | Variants identified by exome sequencing of FF | Variants identified by exome sequencing of FFPE |
|--------------------|---------------|----------------|-------------|------------------------------------------------|-----------------------------------------------|-------------------------------------------------|
| Spontaneous- HCC-1 | VF202/BC15616 | 700304         | <i>Hras</i> | Q61K                                           | Q61K                                          | Q61K                                            |
| Spontaneous- HCC-2 | VF245/BC15585 | 700347         | <i>Hras</i> | Q61K                                           | Q61K                                          | Q61K                                            |

|                          |              |         |               |       |      |      |
|--------------------------|--------------|---------|---------------|-------|------|------|
| Spontaneous- HCC-3       | VM8/BC1832   | 9504548 |               |       |      |      |
| GBE-HCC-1, 2000<br>mg/kg | M175/BC15578 | 700277  | <i>Ctnnb1</i> | Δ5-26 | -    | -    |
| GBE-HCC-2, 2000<br>mg/kg | M181/BC15563 | 700283  | <i>Ctnnb1</i> | Δ5-13 | -    | -    |
| GBE-HCC-3, 2000<br>mg/kg | F398/BC15605 | 700500  | <i>Ctnnb1</i> | S45F  | -    | -    |
| GBE-HCC-4, 2000<br>mg/kg | F382/BC15624 | 700484  | <i>Ctnnb1</i> | T41A  | T41A | -    |
|                          |              |         |               | T42P  | -    | -    |
| MEG-HCC-1, 37<br>mg/kg   | M64/BC1867   | 9504604 | <i>Ctnnb1</i> | D32Y  | -    | -    |
|                          |              |         | <i>Hras</i>   | Q61R  | Q61R | Q61R |
| MEG-HCC-2, 75<br>mg/kg   | M129/BC1834  | 9504669 | <i>Ctnnb1</i> | D32N  | D32N | -    |
|                          |              |         |               | Q28L  | -    | -    |
| MEG-HCC-3,<br>150 mg/kg  | M196/BC1885  | 9504736 | <i>Ctnnb1</i> | G34R  | D32Y |      |
|                          |              |         | <i>Hras</i>   | Q34L  | -    | -    |



| Gene          | SIFT score | S1-FF        | S1-FFPE | S2-FF    | S2-FFPE | S3-FF   | S3-FFPE |
|---------------|------------|--------------|---------|----------|---------|---------|---------|
|               |            | ID: VF202/BC | 700304  | VF245/BC | 700347  | VM8/BC1 | 9504548 |
| 2900026A02Rik | 0          | 0            | 0       | 0        | 0       | 0       | 0       |
| 4930447C04Rik | 0          | 0            | 0       | 0        | 0       | 0       | 0       |
| 4933403O08Rik | 0          | 0            | 0       | 0        | 0       | 0       | 0       |
| 9330159F19Rik | 0.01       | 0            | 0       | 0        | 0       | 0       | 0       |
| A330021E22Rik | 0          | 0            | 0       | 0        | 0       | 0       | 0       |
| Abhd13        | 0          | 0            | 0       | 0        | 0       | 0       | 0       |
| Acaca         | 0.01       | G547A        | 0       | 0        | 0       | 0       | 0       |
| Acad8         | 0          | 0            | 0       | 0        | 0       | 0       | 0       |
| Acot4         | 0.02       | 0            | 0       | 0        | 0       | 0       | 0       |
| Actn1         | 0.02       | 0            | 0       | 0        | 0       | 0       | 0       |
| Adnp2         | 0.03       | 0            | 0       | 0        | 0       | 0       | 0       |
| Akap6         | 0          | 0            | 0       | 0        | 0       | 0       | 0       |
| Alb           | 0.02       | 0            | 0       | 0        | 0       | 0       | 0       |
| Angel2        | 0          | 0            | 0       | 0        | 0       | 0       | 0       |
| Ankrd5        | 0          | 0            | 0       | 0        | 0       | 0       | 0       |
| Ano5          | 0.03       | 0            | 0       | 0        | 0       | 0       | 0       |
| Apc           | 0.01       | T617N        | 0       | 0        | 0       | 0       | 0       |
| Atp1a2        | 0          | 0            | 0       | 0        | 0       | 0       | 0       |
| Atp6v0a2      | 0          | 0            | 0       | 0        | 0       | 0       | 0       |
| Atp8a2        | 0          | 0            | 0       | 0        | 0       | 0       | 0       |
| B4galnt3      | 0.04       | 0            | 0       | 0        | 0       | 0       | 0       |
| Bahd1         | 0.02       | 0            | 0       | 0        | 0       | 0       | 0       |
| Baiap3        | 0.02       | 0            | 0       | 0        | 0       | 0       | 0       |
| Best3         | 0          | 0            | 0       | 0        | 0       | 0       | 0       |
| Blk           | 0          | 0            | 0       | 0        | 0       | 0       | 0       |
| Bpifa1        | 0.01       | 0            | 0       | 0        | 0       | 0       | 0       |
| Bpifb1        | 0          | 0            | 0       | 0        | 0       | 0       | 0       |
| Bves          | 0          | 0            | 0       | M66K     | 0       | 0       | 0       |
| Bves          | 0          | 0            | 0       | 0        | 0       | R180S   | 0       |
| Bves          | 0          | 0            | 0       | 0        | 0       | P195L   | 0       |
| C3            | 0.04       | 0            | 0       | 0        | 0       | 0       | 0       |
| C4b           | 0.02       | 0            | S194P   | 0        | 0       | 0       | 0       |
| C6            | 0          | 0            | 0       | 0        | 0       | 0       | 0       |
| Cadps         | 0          | 0            | 0       | 0        | 0       | 0       | 0       |
| Card10        | 0.01       | 0            | 0       | 0        | 0       | 0       | 0       |
| Ccdc85b       | 0          | 0            | 0       | 0        | 0       | 0       | 0       |
| Ccnb2         | 0.01       | 0            | 0       | 0        | 0       | 0       | 0       |
| Ccr3          | 0.02       | 0            | 0       | 0        | 0       | D134H   | 0       |
| Cd200r4       | 0          | 0            | 0       | 0        | 0       | 0       | 0       |
| Cd209b        | 0.03       | K147M        | 0       | 0        | 0       | 0       | 0       |
| Cdh7          | 0.03       | 0            | 0       | 0        | 0       | 0       | 0       |
| Celsr3        | 0.01       | 0            | 0       | 0        | 0       | 0       | 0       |
| Cfp           | 0          | 0            | 0       | 0        | 0       | 0       | 0       |
| Chrna7        | 0.02       | 0            | 0       | 0        | 0       | 0       | 0       |

|         |      |        |        |       |   |   |       |
|---------|------|--------|--------|-------|---|---|-------|
| Ckmt2   | 0    | 0      | 0      | 0     | 0 | 0 | 0     |
| Cramp1l | 0    | 0      | 0      | 0     | 0 | 0 | 0     |
| Dach1   | 0.01 | 0      | 0      | 0     | 0 | 0 | 0     |
| Dct     | 0.02 | 0      | 0      | 0     | 0 | 0 | 0     |
| Ddx26b  | 0    | 0      | 0      | 0     | 0 | 0 | 0     |
| Ddx54   | 0.03 | 0      | 0      | 0     | 0 | 0 | 0     |
| Dgcr14  | 0.02 | 0      | 0      | 0     | 0 | 0 | 0     |
| Dhx29   | 0.01 | 0      | 0      | 0     | 0 | 0 | 0     |
| Dhx35   | 0    | L204F  | 0      | L204F | 0 | 0 | 0     |
| Dhx38   | 0    | 0      | 0      | 0     | 0 | 0 | 0     |
| Dmrta2  | 0    | 0      | 0      | 0     | 0 | 0 | 0     |
| Dnahc7b | 0.04 | 0      | 0      | 0     | 0 | 0 | 0     |
| Dnm1    | 0.03 | F582C  | F582C  | 0     | 0 | 0 | 0     |
| Dock10  | 0    | 0      | 0      | 0     | 0 | 0 | 0     |
| Dub1    | 0    | 0      | 0      | 0     | 0 | 0 | 0     |
| Dub3    | 0    | 0      | 0      | 0     | 0 | 0 | 0     |
| Emb     | 0.04 | 0      | 0      | 0     | 0 | 0 | 0     |
| Erbp4   | 0.03 | 0      | 0      | 0     | 0 | 0 | 0     |
| Ercc5   | 0.03 | 0      | 0      | 0     | 0 | 0 | 0     |
| Esr2    | 0    | 0      | 0      | 0     | 0 | 0 | 0     |
| Etv5    | 0.01 | 0      | 0      | 0     | 0 | 0 | 0     |
| F8      | 0.03 | 0      | 0      | 0     | 0 | 0 | 0     |
| Fam108c | 0    | 0      | 0      | 0     | 0 | 0 | 0     |
| Fam151b | 0.03 | 0      | 0      | 0     | 0 | 0 | 0     |
| Fasn    | 0.04 | E1830G | E1830G | 0     | 0 | 0 | 0     |
| Fat2    | 0    | 0      | 0      | 0     | 0 | 0 | 0     |
| Fbln2   | 0.02 | 0      | 0      | 0     | 0 | 0 | 0     |
| Fbln5   | 0    | 0      | 0      | 0     | 0 | 0 | 0     |
| Flrt2   | 0    | 0      | 0      | 0     | 0 | 0 | 0     |
| Fn1     | 0.03 | 0      | 0      | 0     | 0 | 0 | 0     |
| Frmd3   | 0    | 0      | 0      | 0     | 0 | 0 | 0     |
| Gal3st3 | 0    | 0      | 0      | 0     | 0 | 0 | 0     |
| Gm10324 | 0    | 0      | 0      | 0     | 0 | 0 | 0     |
| Gm15800 | 0    | 0      | 0      | 0     | 0 | 0 | 0     |
| Gm6588  | 0.01 | 0      | 0      | 0     | 0 | 0 | 0     |
| Gm7173  | 0.01 | 0      | 0      | 0     | 0 | 0 | R632C |
| Gnas    | 0    | 0      | 0      | 0     | 0 | 0 | 0     |
| Gpaa1   | 0    | 0      | 0      | 0     | 0 | 0 | 0     |
| Gpr17   | 0    | 0      | 0      | 0     | 0 | 0 | 0     |
| Gpr179  | 0.01 | 0      | 0      | 0     | 0 | 0 | 0     |
| Gria1   | 0.02 | 0      | 0      | 0     | 0 | 0 | 0     |
| Grip1   | 0    | 0      | 0      | 0     | 0 | 0 | 0     |
| Grk4    | 0    | 0      | 0      | 0     | 0 | 0 | 0     |
| Gspt1   | 0    | 0      | 0      | 0     | 0 | 0 | 0     |
| Gylt1b  | 0.02 | 0      | 0      | 0     | 0 | 0 | 0     |
| H2-Q1   | 0.02 | 0      | 0      | 0     | 0 | 0 | 0     |
| H6pd    | 0    | 0      | 0      | 0     | 0 | 0 | 0     |



|           |      |       |   |         |   |         |   |
|-----------|------|-------|---|---------|---|---------|---|
| Haghl     | 0.04 | 0     | 0 | 0       | 0 | 0       | 0 |
| Hat1      | 0    | 0     | 0 | 0       | 0 | 0       | 0 |
| Hfm1      | 0    | 0     | 0 | 0       | 0 | 0       | 0 |
| Hist1h2ak | 0    | 0     | 0 | 0       | 0 | 0       | 0 |
| Hist1h2bc | 0    | 0     | 0 | 0 R73C  | 0 | 0 R73C  | 0 |
| Hkdc1     | 0.03 | 0     | 0 | 0       | 0 | 0       | 0 |
| Hmcn1     | 0.01 | 0     | 0 | 0       | 0 | 0       | 0 |
| Hnf4g     | 0    | 0     | 0 | 0       | 0 | 0       | 0 |
| Hsd3b7    | 0    | 0     | 0 | 0       | 0 | 0       | 0 |
| Htra2     | 0    | 0     | 0 | 0       | 0 | 0       | 0 |
| Ibtk      | 0.01 | 0     | 0 | 0       | 0 | 0       | 0 |
| Igf1r     | 0.02 | 0     | 0 | 0       | 0 | 0       | 0 |
| Igsf9b    | 0.01 | 0     | 0 | 0       | 0 | 0       | 0 |
| Impdh1    | 0.02 | 0     | 0 | 0       | 0 | 0       | 0 |
| Inpp1     | 0    | 0     | 0 | 0       | 0 | 0       | 0 |
| Inpp4b    | 0    | 0     | 0 | 0       | 0 | 0       | 0 |
| Irx2      | 0    | 0     | 0 | 0       | 0 | 0       | 0 |
| Islr2     | 0.01 | E617D | 0 | 0       | 0 | 0       | 0 |
| Itga3     | 0.01 | 0     | 0 | 0       | 0 | 0       | 0 |
| Jkamp     | 0    | 0     | 0 | 0       | 0 | 0       | 0 |
| Kcnc3     | 0    | 0     | 0 | 0       | 0 | 0       | 0 |
| Kcnd1     | 0.02 | 0     | 0 | 0 P10S  | 0 | 0       | 0 |
| Kcnq3     | 0.01 | 0     | 0 | 0       | 0 | 0       | 0 |
| Kif17     | 0    | 0     | 0 | 0       | 0 | 0       | 0 |
| Kif5a     | 0    | 0     | 0 | 0       | 0 | 0       | 0 |
| Kif5c     | 0    | 0     | 0 | 0       | 0 | 0       | 0 |
| Klc2      | 0.01 | 0     | 0 | 0       | 0 | 0       | 0 |
| Klf11     | 0.04 | 0     | 0 | 0       | 0 | 0       | 0 |
| Klhl1     | 0    | 0     | 0 | 0       | 0 | 0       | 0 |
| Klhl29    | 0.03 | 0     | 0 | 0       | 0 | 0       | 0 |
| Krt25     | 0    | 0     | 0 | 0       | 0 | 0       | 0 |
| Lamtor2   | 0    | 0     | 0 | 0       | 0 | 0       | 0 |
| Ldb2      | 0    | I320F | 0 | 0       | 0 | 0       | 0 |
| Liph      | 0.01 | 0     | 0 | 0       | 0 | 0       | 0 |
| Lpin1     | 0.02 | 0     | 0 | 0       | 0 | 0       | 0 |
| Lrp6      | 0.02 | 0     | 0 | 0       | 0 | 0       | 0 |
| Lrrc15    | 0    | 0     | 0 | 0       | 0 | 0       | 0 |
| Lrrc50    | 0.02 | 0     | 0 | 0       | 0 | 0       | 0 |
| Map3k5    | 0    | 0     | 0 | 0 K339M | 0 | 0       | 0 |
| Mid1      | 0    | 0     | 0 | 0       | 0 | 0       | 0 |
| Mipol1    | 0    | 0     | 0 | 0       | 0 | 0       | 0 |
| Mtr       | 0    | 0     | 0 | 0       | 0 | 0       | 0 |
| Mxra8     | 0    | 0     | 0 | 0       | 0 | 0       | 0 |
| Naglu     | 0    | 0     | 0 | 0       | 0 | 0 R563H | 0 |
| Nap1l2    | 0.01 | 0     | 0 | 0       | 0 | 0       | 0 |
| Nckap1l   | 0    | 0     | 0 | 0       | 0 | 0       | 0 |
| Ndufs7    | 0.04 | 0     | 0 | 0       | 0 | 0       | 0 |

|          |      |       |       |   |       |   |       |
|----------|------|-------|-------|---|-------|---|-------|
| Nell1    | 0    | 0     | 0     | 0 | 0     | 0 | 0     |
| Nkpd1    | 0.01 | 0     | 0     | 0 | 0     | 0 | 0     |
| Nlrp4f   | 0.02 | 0     | 0     | 0 | 0     | 0 | 0     |
| Nr4a3    | 0    | 0     | 0     | 0 | 0     | 0 | 0     |
| Nudt12   | 0.04 | 0     | 0     | 0 | 0     | 0 | 0     |
| Oc90     | 0.02 | 0     | 0     | 0 | 0     | 0 | 0     |
| Olfml2a  | 0.03 | 0     | 0     | 0 | V534M | 0 | 0     |
| Olfr103  | 0    | 0     | 0     | 0 | 0     | 0 | 0     |
| Olfr1046 | 0    | 0     | 0     | 0 | 0     | 0 | 0     |
| Olfr1095 | 0.02 | 0     | 0     | 0 | 0     | 0 | 0     |
| Olfr1106 | 0    | 0     | 0     | 0 | 0     | 0 | 0     |
| Olfr1138 | 0.03 | 0     | 0     | 0 | 0     | 0 | 0     |
| Olfr1197 | 0    | 0     | 0     | 0 | 0     | 0 | T197R |
| Olfr1198 | 0    | 0     | 0     | 0 | 0     | 0 | 0     |
| Olfr1272 | 0    | 0     | 0     | 0 | 0     | 0 | 0     |
| Olfr1301 | 0    | 0     | 0     | 0 | 0     | 0 | 0     |
| Olfr1355 | 0.01 | 0     | 0     | 0 | 0     | 0 | 0     |
| Olfr1387 | 0.01 | 0     | 0     | 0 | 0     | 0 | 0     |
| Olfr1414 | 0    | 0     | 0     | 0 | 0     | 0 | 0     |
| Olfr142  | 0    | 0     | 0     | 0 | 0     | 0 | 0     |
| Olfr1471 | 0    | 0     | 0     | 0 | 0     | 0 | 0     |
| Olfr169  | 0.02 | G253V | G253V | 0 | 0     | 0 | 0     |
| Olfr318  | 0    | 0     | 0     | 0 | 0     | 0 | 0     |
| Olfr412  | 0.02 | 0     | 0     | 0 | 0     | 0 | 0     |
| Olfr482  | 0    | 0     | 0     | 0 | 0     | 0 | 0     |
| Olfr524  | 0.03 | 0     | 0     | 0 | 0     | 0 | S195P |
| Olfr628  | 0.04 | 0     | 0     | 0 | I19V  | 0 | 0     |
| Olfr924  | 0    | 0     | 0     | 0 | 0     | 0 | 0     |
| Onecut2  | 0    | 0     | 0     | 0 | 0     | 0 | 0     |
| Otop3    | 0.04 | 0     | 0     | 0 | 0     | 0 | 0     |
| P2ry2    | 0.03 | 0     | 0     | 0 | 0     | 0 | 0     |
| Pbxip1   | 0    | 0     | 0     | 0 | 0     | 0 | 0     |
| Pcdh19   | 0.01 | 0     | 0     | 0 | 0     | 0 | 0     |
| Pcsk5    | 0    | 0     | 0     | 0 | 0     | 0 | 0     |
| Pde10a   | 0    | 0     | 0     | 0 | 0     | 0 | 0     |
| Pdk2     | 0    | 0     | 0     | 0 | 0     | 0 | 0     |
| Pdzn4    | 0    | 0     | 0     | 0 | 0     | 0 | 0     |
| Pes1     | 0.03 | 0     | 0     | 0 | 0     | 0 | 0     |
| Phex     | 0.01 | A552S | 0     | 0 | 0     | 0 | 0     |
| Pik3ip1  | 0    | 0     | 0     | 0 | 0     | 0 | 0     |
| Pkm      | 0    | 0     | L140P | 0 | 0     | 0 | 0     |
| Pkm      | 0    | 0     | I142S | 0 | I142S | 0 | 0     |
| Plag1    | 0    | 0     | 0     | 0 | 0     | 0 | 0     |
| Plce1    | 0    | 0     | 0     | 0 | 0     | 0 | 0     |
| Pmepa1   | 0.03 | 0     | 0     | 0 | 0     | 0 | 0     |
| Ppp2r5a  | 0    | 0     | 0     | 0 | 0     | 0 | 0     |
| Prdm16   | 0    | 0     | 0     | 0 | 0     | 0 | 0     |

|         |      |       |       |       |       |   |       |
|---------|------|-------|-------|-------|-------|---|-------|
| Prokr1  | 0    | 0     | 0     | 0     | 0     | 0 | 0     |
| Psmb3   | 0    | 0     | 0     | A179V | 0     | 0 | 0     |
| Rad21   | 0.03 | 0     | 0     | 0     | 0     | 0 | 0     |
| Rcor1   | 0    | 0     | 0     | 0     | 0     | 0 | 0     |
| Rcor2   | 0    | 0     | 0     | 0     | 0     | 0 | 0     |
| Rgs3    | 0    | 0     | 0     | 0     | 0     | 0 | 0     |
| Rnpc3   | 0.03 | M494V | M494V | 0     | 0     | 0 | 0     |
| Rorb    | 0    | 0     | 0     | 0     | 0     | 0 | 0     |
| Ros1    | 0    | 0     | 0     | 0     | 0     | 0 | 0     |
| Rpa1    | 0    | 0     | 0     | 0     | 0     | 0 | 0     |
| Rpl35   | 0    | 0     | P80L  | 0     | 0     | 0 | P80L  |
| Rpn1    | 0    | 0     | 0     | 0     | 0     | 0 | 0     |
| Rps5    | 0    | 0     | 0     | 0     | 0     | 0 | 0     |
| Rsl24d1 | 0    | 0     | 0     | 0     | 0     | 0 | 0     |
| Rxb     | 0    | 0     | 0     | 0     | 0     | 0 | 0     |
| Sec31a  | 0    | 0     | 0     | 0     | 0     | 0 | 0     |
| Sf3b4   | 0    | 0     | 0     | 0     | S121R | 0 | 0     |
| Siglec1 | 0.03 | 0     | 0     | 0     | 0     | 0 | 0     |
| Siglec1 | 0.03 | 0     | 0     | 0     | 0     | 0 | 0     |
| Slc28a1 | 0.01 | 0     | 0     | 0     | 0     | 0 | 0     |
| Smarca5 | 0    | 0     | 0     | M450I | 0     | 0 | 0     |
| Snrnp35 | 0.03 | G21S  | 0     | 0     | 0     | 0 | 0     |
| Sort1   | 0.01 | 0     | 0     | 0     | S491I | 0 | 0     |
| Spata5  | 0    | 0     | 0     | 0     | 0     | 0 | 0     |
| Spint4  | 0    | 0     | 0     | 0     | 0     | 0 | 0     |
| Stox2   | 0    | 0     | 0     | 0     | 0     | 0 | 0     |
| Sulf1   | 0    | 0     | 0     | 0     | 0     | 0 | Y135N |
| Sun5    | 0    | 0     | 0     | 0     | 0     | 0 | 0     |
| Sycp2   | 0.04 | 0     | 0     | 0     | 0     | 0 | 0     |
| Tacc1   | 0.01 | 0     | 0     | 0     | 0     | 0 | 0     |
| Tbx1    | 0.01 | 0     | 0     | 0     | E127D | 0 | 0     |
| Tcl1b4  | 0    | 0     | 0     | 0     | 0     | 0 | 0     |
| Tec     | 0    | 0     | 0     | 0     | 0     | 0 | 0     |
| Tia1    | 0.04 | 0     | 0     | 0     | 0     | 0 | 0     |
| Tmem171 | 0.03 | 0     | 0     | 0     | 0     | 0 | 0     |
| Tmem245 | 0.03 | 0     | 0     | 0     | 0     | 0 | 0     |
| Tmem33  | 0    | 0     | 0     | 0     | 0     | 0 | 0     |
| Tmem81  | 0.01 | 0     | 0     | 0     | 0     | 0 | 0     |
| Tmppe   | 0.04 | 0     | 0     | 0     | 0     | 0 | 0     |
| Tnik    | 0    | 0     | 0     | 0     | 0     | 0 | 0     |
| Trim75  | 0    | 0     | 0     | 0     | 0     | 0 | 0     |
| Trpc1   | 0    | 0     | 0     | 0     | 0     | 0 | 0     |
| Trpc2   | 0.01 | 0     | 0     | 0     | 0     | 0 | 0     |
| Trpm4   | 0.02 | 0     | 0     | 0     | 0     | 0 | 0     |
| Tspyl2  | 0    | 0     | 0     | 0     | 0     | 0 | 0     |
| Tulp4   | 0.02 | 0     | 0     | 0     | 0     | 0 | 0     |
| Tulp4   | 0    | 0     | 0     | 0     | 0     | 0 | 0     |

|          |      |      |      |   |       |   |   |
|----------|------|------|------|---|-------|---|---|
| Ubn1     | 0.04 | 0    | 0    | 0 | 0     | 0 | 0 |
| Ulk1     | 0    | G97C | G97C | 0 | 0     | 0 | 0 |
| Unc13c   | 0    | 0    | 0    | 0 | 0     | 0 | 0 |
| Usp13    | 0    | 0    | 0    | 0 | 0     | 0 | 0 |
| Usp22    | 0.01 | 0    | 0    | 0 | 0     | 0 | 0 |
| Vmn1r15  | 0.01 | 0    | 0    | 0 | 0     | 0 | 0 |
| Vmn1r199 | 0.02 | 0    | 0    | 0 | 0     | 0 | 0 |
| Vmn1r235 | 0    | 0    | 0    | 0 | M22K  | 0 | 0 |
| Vmn2r27  | 0    | 0    | 0    | 0 | 0     | 0 | 0 |
| Vmn2r41  | 0.02 | 0    | 0    | 0 | 0     | 0 | 0 |
| Vmn2r89  | 0.02 | 0    | 0    | 0 | S298L | 0 | 0 |
| Vmn2r90  | 0.01 | 0    | 0    | 0 | 0     | 0 | 0 |
| Vwf      | 0.01 | 0    | 0    | 0 | 0     | 0 | 0 |
| Vwf      | 0.02 | 0    | 0    | 0 | 0     | 0 | 0 |
| Wdr67    | 0    | 0    | 0    | 0 | 0     | 0 | 0 |
| Wnk2     | 0    | 0    | 0    | 0 | 0     | 0 | 0 |
| Zc3h6    | 0    | 0    | 0    | 0 | 0     | 0 | 0 |
| Zfp652   | 0    | 0    | 0    | 0 | 0     | 0 | 0 |
| Zhx3     | 0    | 0    | 0    | 0 | 0     | 0 | 0 |
| Zkscan14 | 0.02 | 0    | 0    | 0 | 0     | 0 | 0 |















|       | MEG1-FFPE | MEG2-FF | MEG2-FFPE | MEG3-FF | MEG3-FFPE |
|-------|-----------|---------|-----------|---------|-----------|
|       | 9504604   | M129/BC | 9504669   | M196/BC | 9504736   |
|       | 0         | 0       | 0         | R222M   | R222M     |
|       | 0         | 0       | S531F     |         | 0         |
|       | 0         | 0       | 0         | 0       | 0         |
|       | 0         | 0       | 0         | S162C   | S162C     |
|       | 0         | 0       | 0         | 0       | E759G     |
|       | 0         | 0       | 0         | S221I   | S221I     |
|       | 0         | 0       | 0         | 0       | 0         |
|       | 0         | 0       | 0         | 0       | D74Y      |
|       | 0         | 0       | 0         | 0       | P368S     |
|       | 0         | 0       | 0         | 0       | 0         |
|       | 0         | 0       | 0         | P860A   | P860A     |
|       | 0         | 0       | L644V     | 0       | 0         |
|       | 0         | 0       | 0         | S502G   | S502G     |
|       | 0         | 0       | 0         | 0       | Y291C     |
|       | 0         | 0       | 0         | I573F   | 0         |
|       | 0         | 0       | 0         | 0       | L76M      |
|       | 0         | 0       | 0         | 0       | 0         |
|       | 0         | 0       | 0         | 0       | G728A     |
| R451Q | 0         | 0       | 0         | 0       | 0         |
|       | 0         | 0       | 0         | V756E   | V756E     |
|       | 0         | 0       | 0         | 0       | 0         |
|       | 0         | S673N   | S673N     | 0       | 0         |
|       | 0         | 0       | 0         | 0       | L746P     |
|       | 0         | 0       | 0         | D312N   | D312N     |
|       | 0         | G388V   | G388V     | 0       | 0         |
|       | 0         | 0       | 0         | 0       | H262R     |
|       | 0         | S280I   | S280I     | 0       | 0         |
|       | 0         | 0       | 0         | 0       | 0         |
|       | 0         | R180S   | 0         | R180S   | 0         |
|       | 0         | P195L   | 0         | P195L   | 0         |
|       | 0         | 0       | 0         | 0       | Y1428C    |
|       | 0         | 0       | 0         | 0       | 0         |
|       | 0         | 0       | 0         | N625K   | N625K     |
|       | 0         | 0       | 0         | 0       | 0         |
|       | 0         | 0       | 0         | A700V   | A700V     |
|       | 0         | 0       | 0         | L30Q    | L30Q      |
|       | 0         | 0       | 0         | 0       | 0         |
|       | 0         | 0       | 0         | 0       | 0         |
|       | 0         | E165D   | E165D     | 0       | 0         |
|       | 0         | 0       | 0         | 0       | 0         |
|       | 0         | 0       | 0         | Y784C   | 0         |
| T785R | 0         | 0       | 0         | 0       | 0         |
|       | 0         | 0       | 0         | 0       | R278W     |
|       | 0         | 0       | 0         | A294P   | 0         |

|   |       |       |        |        |
|---|-------|-------|--------|--------|
| 0 | 0     | 0     | L17Q   | 0      |
| 0 | 0     | 0     | 0      | G702D  |
| 0 | 0     | 0     | 0      | 0      |
| 0 | 0     | 0     | S132F  | S132F  |
| 0 | 0     | 0     | 0      | V32E   |
| 0 | T196P | T196P | 0      | 0      |
| 0 | 0     | 0     | Y421C  | Y421C  |
| 0 | 0     | 0     | 0      | 0      |
| 0 | 0     | 0     | 0      | 0      |
| 0 | 0     | 0     | M978L  | M978L  |
| 0 | E103Q | E103Q | 0      | 0      |
| 0 | 0     | 0     | 0      | 0      |
| 0 | 0     | 0     | 0      | 0      |
| 0 | 0     | 0     | 0      | Y1946C |
| 0 | 0     | 0     | G306R  | G306R  |
| 0 | 0     | 0     | G532V  | G532V  |
| 0 | L97F  | L97F  | 0      | 0      |
| 0 | 0     | 0     | C559S  | C559S  |
| 0 | D955A | D955A | 0      | 0      |
| 0 | 0     | 0     | 0      | I329N  |
| 0 | 0     | R240C | 0      | R240C  |
| 0 | 0     | 0     | C1775S | C1775S |
| 0 | 0     | 0     | F115I  | 0      |
| 0 | S181I | S181I | 0      | 0      |
| 0 | 0     | 0     | 0      | 0      |
| 0 | 0     | 0     | 0      | 0      |
| 0 | 0     | 0     | 0      | 0      |
| 0 | 0     | 0     | 0      | 0      |
| 0 | 0     | 0     | 0      | 0      |
| 0 | 0     | 0     | 0      | 0      |
| 0 | Y77S  | Y77S  | 0      | 0      |
| 0 | 0     | 0     | 0      | 0      |
| 0 | 0     | 0     | 0      | 0      |
| 0 | 0     | 0     | 0      | R3052H |
| 0 | K307N | K307N | 0      | 0      |
| 0 | 0     | 0     | 0      | 0      |
| 0 | R926C | R926C | 0      | 0      |
| 0 | 0     | 0     | K621E  | 0      |
| 0 | 0     | 0     | A45T   | 0      |
| 0 | 0     | 0     | 0      | 0      |
| 0 | D733A | D733A | 0      | 0      |
| 0 | 0     | 0     | L958S  | L958S  |
| 0 | 0     | 0     | 0      | A416D  |
| 0 | 0     | 0     | 0      | 0      |
| 0 | 0     | 0     | H99Y   | 0      |
| 0 | 0     | 0     | 0      | 0      |
| 0 | G37R  | G37R  | 0      | 0      |

|       |        |        |       |       |       |
|-------|--------|--------|-------|-------|-------|
| 0     | 0      | 0      | K282N | K282N |       |
| 0     | 0      | 0      | Y348C |       | 0     |
| 0     | 0      | 0      | M1K   |       | 0     |
| 0     | L66P   | L66P   |       | 0     | 0     |
| 0     | 0      | 0      | R73C  |       | 0     |
| 0     | 0      | 0      |       | 0     | 0     |
| 0     | 0      | 0      |       | 0     | 0     |
| 0     | 0      | 0      |       | 0     | 0     |
| 0     | I25T   |        |       | 0     | 0     |
| 0     | 0      | 0      |       | 0     | 0     |
| 0     | 0      | 0      |       | 0     | F253L |
| 0     | 0      | 0      | L186W | L186W |       |
| 0     | 0      | 0      |       | 0     | A584T |
| 0     | 0      | 0      |       | 0     | V384A |
| 0     | L107F  | L107F  |       | 0     | 0     |
| 0     | R698C  | R698C  |       | 0     | 0     |
| 0     | 0      | 0      | Y104S | Y104S |       |
| 0     | 0      | 0      |       | 0     | 0     |
| 0     | 0      | 0      |       | 0     | R910C |
| 0     | C139S  | C139S  |       | 0     | 0     |
| 0     | 0      | 0      |       | 0     | 0     |
| 0     | 0      | 0      |       | 0     | 0     |
| 0     | 0      | 0      | V796I | V796I |       |
| 0     | 0      | 0      | M308T | M308T |       |
| G782W | 0      | 0      |       | 0     | 0     |
| 0     | D232Y  | D232Y  |       | 0     | 0     |
| 0     | 0      | 0      |       | 0     | H35L  |
| 0     | 0      | 0      | P358L | P358L |       |
| 0     | 0      | 0      | I256N |       | 0     |
| 0     | 0      | 0      | A714T |       | 0     |
| 0     | R252T  | R252T  |       | 0     | 0     |
| 0     | 0      | 0      |       | 0     | 0     |
| 0     | 0      | 0      |       | 0     | 0     |
| 0     | D50E   | D50E   |       | 0     | 0     |
| 0     | 0      | 0      |       | 0     | 0     |
| 0     | 0      | 0      | K470N |       | 0     |
| 0     | L228H  | L228H  |       | 0     | 0     |
| D220N | 0      | 0      |       | 0     | 0     |
| 0     | 0      | 0      |       | 0     | 0     |
| 0     | 0      | 0      | G434R |       | 0     |
| 0     | 0      | 0      | N264Y |       | 0     |
| 0     | D1253Y | D1253Y |       | 0     | 0     |
| 0     | 0      | 0      | L65P  | L65P  |       |
| 0     | 0      | 0      |       | 0     | 0     |
| 0     | 0      | 0      | G36S  | G36S  |       |
| 0     | M849T  | M849T  |       | 0     | 0     |
| 0     | 0      | 0      |       | 0     | 0     |

|       |   |       |       |        |       |
|-------|---|-------|-------|--------|-------|
|       | 0 | 0     | 0     | 0      | C407S |
|       | 0 | 0     | 0     | 0      | 0     |
|       | 0 | 0     | 0     | 0      | 0     |
|       | 0 | 0     | 0     | 0      | L599V |
| C247F | 0 | 0     | C247F | 0      | 0     |
|       | 0 | L75F  | L75F  | 0      | 0     |
|       | 0 | 0     | 0     | 0      | 0     |
|       | 0 | 0     | 0     | 0      | M57V  |
| T270I | 0 | 0     | T270I | 0      | 0     |
|       | 0 | 0     | 0     | 0      | 0     |
|       | 0 | 0     | 0     | A224D  | A224D |
|       | 0 | I49F  | I49F  | 0      | 0     |
|       | 0 | 0     | 0     | 0      | 0     |
|       | 0 | 0     | 0     | 0      | 0     |
|       | 0 | D178N | D178N | 0      | 0     |
|       | 0 | C141Y | C141Y | 0      | 0     |
|       | 0 | 0     | 0     | 0      | 0     |
|       | 0 | 0     | 0     | L212M  | L212M |
|       | 0 | 0     | 0     | Y123N  | 0     |
|       | 0 | 0     | 0     | M298I  | 0     |
|       | 0 | 0     | 0     | L224Q  | L224Q |
|       | 0 | 0     | 0     | 0      | 0     |
|       | 0 | 0     | 0     | 0      | 0     |
| R122H | 0 | F15L  | F15L  | 0      | 0     |
|       | 0 | 0     | 0     | 0      | 0     |
|       | 0 | 0     | 0     | 0      | 0     |
|       | 0 | 0     | 0     | 0      | N2K   |
|       | 0 | 0     | 0     | 0      | 0     |
|       | 0 | H550N | H550N | 0      | 0     |
|       | 0 | 0     | 0     | 0      | A83S  |
|       | 0 | W402L | W402L | 0      | 0     |
|       | 0 | 0     | 0     | S983L  | S983L |
|       | 0 | 0     | 0     | P202T  | P202T |
|       | 0 | 0     | 0     | C11W   | C11W  |
|       | 0 | 0     | 0     | M1I    | 0     |
|       | 0 | 0     | 0     | 0      | 0     |
|       | 0 | 0     | 0     | 0      | V426I |
|       | 0 | 0     | 0     | 0      | 0     |
|       | 0 | 0     | 0     | D166N  | 0     |
|       | 0 | 0     | 0     | 0      | 0     |
|       | 0 | 0     | 0     | 0      | 0     |
|       | 0 | 0     | 0     | R197W  | R197W |
|       | 0 | 0     | 0     | V641F  | 0     |
|       | 0 | 0     | 0     | H257Y  | 0     |
|       | 0 | 0     | 0     | 0      | 0     |
|       | 0 | 0     | 0     | C1011Y | 0     |



|       |   |       |       |        |        |
|-------|---|-------|-------|--------|--------|
|       | 0 | 0     | 0     | L1124F | 0      |
|       | 0 | 0     | 0     | 0      | 0      |
|       | 0 | 0     | 0     | 0      | 0      |
|       | 0 | T814R | T814R | 0      | 0      |
|       | 0 | 0     | 0     | H196Q  | 0      |
|       | 0 | 0     | 0     | V235F  | V235F  |
|       | 0 | 0     | 0     | 0      | 0      |
|       | 0 | 0     | 0     | 0      | 0      |
|       | 0 | 0     | 0     | 0      | 0      |
|       | 0 | 0     | 0     | 0      | M593K  |
|       | 0 | 0     | 0     | 0      | 0      |
|       | 0 | 0     | 0     | A241T  | 0      |
|       | 0 | 0     | 0     | 0      | 0      |
|       | 0 | 0     | 0     | 0      | L622V  |
| Q827L | 0 | 0     | 0     | 0      | 0      |
|       | 0 | 0     | 0     | P1331H | P1331H |
|       | 0 | P835L | P835L | 0      | 0      |
|       | 0 | 0     | 0     | H374Y  | 0      |
|       | 0 | 0     | 0     | P414A  | 0      |
|       | 0 | 0     | 0     | A56V   | 0      |



**Supplementary Table 4. Numbers of tumor *versus* normal variant calls for individual hepatocellular carcinoma samples**

| <b>Treatment</b>                  | <b>Preparation method</b> | <b>Tissue ID</b> | <b>Non-synonymous variant calls</b> | <b>Synonymous + Non-synonymous variant calls</b> |
|-----------------------------------|---------------------------|------------------|-------------------------------------|--------------------------------------------------|
| <b>Spontaneous HCC-1, 0 mg/kg</b> | FF                        | VF202/BC15616    | 37                                  | 50                                               |
|                                   | FFPE                      | 700304           | 38                                  | 61                                               |
| <b>Spontaneous HCC-2, 0 mg/kg</b> | FF                        | VF245/BC15585    | 21                                  | 27                                               |
|                                   | FFPE                      | 700347           | 47                                  | 81                                               |
| <b>Spontaneous HCC-3, 0 mg/kg</b> | FF                        | VM8/BC1832       | 12                                  | 20                                               |
|                                   | FFPE                      | 9504548          | 40                                  | 65                                               |
| <b>GBE-HCC-1, 2000 mg/kg</b>      | FF                        | M175/BC15578     | 18                                  | 19                                               |
|                                   | FFPE                      | 700277           | 48                                  | 77                                               |
| <b>GBE-HCC-2, 2000 mg/kg</b>      | FF                        | M181/BC15563     | 26                                  | 41                                               |
|                                   | FFPE                      | 700283           | 35                                  | 57                                               |
| <b>GBE-HCC-3, 2000 mg/kg</b>      | FF                        | F398/BC15605     | 23                                  | 35                                               |
|                                   | FFPE                      | 700500           | 34                                  | 59                                               |
| <b>GBE-HCC-4, 2000 mg/kg</b>      | FF                        | F382/BC15624     | 19                                  | 39                                               |
|                                   | FFPE                      | 700484           | 32                                  | 68                                               |
| <b>MEG-HCC-1, 37 mg/kg</b>        | FF                        | M64/BC1867       | 39                                  | 53                                               |
|                                   | FFPE                      | 9504604          | 51                                  | 78                                               |
| <b>MEG-HCC-2, 75 mg/kg</b>        | FF                        | M129/BC1834      | 128                                 | 183                                              |
|                                   | FFPE                      | 9504669          | 151                                 | 221                                              |
| <b>MEG-HCC-3, 150 mg/kg</b>       | FF                        | M196/BC1885      | 232                                 | 299                                              |
|                                   | FFPE                      | 9504736          | 247                                 | 323                                              |

**Supplementary Table 5. Sanger sequencing of variants of *Braf* and *Bves* that were identified by exome sequencing**

| Treatment             | FF-Tissue ID  | FFPE-Tissue ID | Gene        | Variant | Exome-seq of FF | Exome-seq of FFPE | Sanger sequencing of FF | Alternate allele frequency for FF |
|-----------------------|---------------|----------------|-------------|---------|-----------------|-------------------|-------------------------|-----------------------------------|
| Spontaneous-HCC-1     | VF202/BC15616 | 700304         |             |         |                 |                   |                         |                                   |
| Spontaneous-HCC-2     | VF245/BC15585 | 700347         | <i>Bves</i> | M66K    | yes             | -                 | -                       | 0.32                              |
| Spontaneous-HCC-3     | VM8/BC1832    | 9504548        | <i>Bves</i> | R180S   | yes             | -                 | -                       | 0.091                             |
|                       |               |                |             | P195L   | yes             | -                 | -                       | 0.134                             |
| GBE-HCC-1, 2000 mg/kg | M175/BC15578  | 700277         | <i>Bves</i> | P195L   | yes             | -                 | -                       | 0.063                             |
| GBE-HCC-2, 2000 mg/kg | M181/BC15563  | 700283         | <i>Bves</i> | P195L   | yes             | -                 | -                       | 0.063                             |
| GBE-HCC-3, 2000 mg/kg | F398/BC15605  | 700500         |             |         |                 |                   |                         |                                   |
| GBE-HCC-4, 2000 mg/kg | F382/BC15624  | 700484         |             |         |                 |                   |                         |                                   |
| MEG-HCC-1, 37 mg/kg   | M64/BC1867    | 9504604        | <i>Bves</i> | R180S   | yes             | -                 | -                       | 0.114                             |
|                       |               |                |             | P195L   | yes             | -                 | -                       | 0.139                             |
| MEG-HCC-2, 75 mg/kg   | M129/BC1834   | 9504669        | <i>Bves</i> | R180S   | yes             | -                 | -                       | 0.089                             |
|                       |               |                |             | P195L   | yes             | -                 | -                       | 0.13                              |
| MEG-HCC-3, 150 mg/kg  | M196/BC1885   | 9504736        | <i>Braf</i> | V637E   | yes             | yes               | yes                     | 0.368                             |
|                       |               |                | <i>Bves</i> | R180S   | yes             | -                 | -                       | 0.059                             |
|                       |               |                |             | P195L   | yes             | -                 | -                       | 0.119                             |

**Supplementary Table 6** –The corresponding mutation counts for each tumor type (Fresh frozen (FF-a) and formalin fixed paraffin embedded (FFPE-b)) that correspond to supplemental figure 2a and 2b, respectively.

**Suppl. Table 6a.**

| <b>FF</b>     | <b>4S</b> | <b>5S</b> | <b>6S</b> | <b>GBE7</b> | <b>GBE8</b> | <b>GBE9</b> | <b>GBE13</b> | <b>MEG10</b> | <b>MEG11</b> | <b>MEG12</b> |
|---------------|-----------|-----------|-----------|-------------|-------------|-------------|--------------|--------------|--------------|--------------|
| <b>C&gt;A</b> | 15        | 8         | 3         | 8           | 13          | 16          | 13           | 16           | 71           | 89           |
| <b>C&gt;G</b> | 9         | 5         | 0         | 6           | 10          | 5           | 5            | 8            | 26           | 45           |
| <b>C&gt;T</b> | 29        | 25        | 16        | 18          | 34          | 29          | 34           | 26           | 69           | 88           |
| <b>T&gt;A</b> | 3         | 3         | 4         | 2           | 6           | 4           | 3            | 6            | 20           | 55           |
| <b>T&gt;C</b> | 10        | 3         | 6         | 6           | 7           | 3           | 10           | 10           | 28           | 71           |
| <b>T&gt;G</b> | 2         | 2         | 1         | 3           | 2           | 1           | 2            | 0            | 7            | 12           |

**Suppl. Table 6b.**

| <b>FFPE</b>   | <b>4S</b> | <b>5S</b> | <b>6S</b> | <b>GBE7</b> | <b>GBE8</b> | <b>GBE9</b> | <b>GBE13</b> | <b>MEG10</b> | <b>MEG11</b> | <b>MEG12</b> |
|---------------|-----------|-----------|-----------|-------------|-------------|-------------|--------------|--------------|--------------|--------------|
| <b>C&gt;A</b> | 19        | 23        | 12        | 24          | 18          | 20          | 16           | 18           | 73           | 73           |
| <b>C&gt;G</b> | 13        | 12        | 8         | 22          | 13          | 14          | 13           | 17           | 38           | 56           |
| <b>C&gt;T</b> | 49        | 61        | 51        | 57          | 52          | 51          | 72           | 59           | 102          | 97           |
| <b>T&gt;A</b> | 3         | 8         | 11        | 8           | 6           | 8           | 9            | 8            | 21           | 55           |
| <b>T&gt;C</b> | 32        | 24        | 27        | 23          | 25          | 15          | 22           | 27           | 43           | 97           |
| <b>T&gt;G</b> | 7         | 9         | 6         | 6           | 8           | 4           | 5            | 6            | 11           | 17           |



| Substitution | Trinucleotide | Somatic Mutat | FF.spontaneo | FF.GBE     | FF.MEG     | FFPE.spontan |
|--------------|---------------|---------------|--------------|------------|------------|--------------|
| C>A          | ACA           | A[C>A]A       | 0            | 0.0118898  | 0.01911188 | 0.01014596   |
| C>A          | ACC           | A[C>A]C       | 0.01331027   | 0          | 0.01184964 | 0.01022229   |
| C>A          | ACG           | A[C>A]G       | 0.0138919    | 0.00833514 | 0.00618372 | 0.00266725   |
| C>A          | ACT           | A[C>A]T       | 0.01363868   | 0.02045802 | 0.02731952 | 0.01047451   |
| C>A          | CCA           | C[C>A]A       | 0.03348236   | 0.0482146  | 0.03875053 | 0.01285723   |
| C>A          | CCC           | C[C>A]C       | 0.03147256   | 0.01416265 | 0.02801885 | 0.03021366   |
| C>A          | CCG           | C[C>A]G       | 0            | 0.00513009 | 0.01902971 | 0.00328326   |
| C>A          | CCT           | C[C>A]T       | 0.01392907   | 0.02507232 | 0.02325099 | 0.01069752   |
| C>A          | GCA           | G[C>A]A       | 0.01421437   | 0          | 0.01739997 | 0.00272916   |
| C>A          | GCC           | G[C>A]C       | 0.00818615   | 0.00491169 | 0.01275369 | 0.00628696   |
| C>A          | GCG           | G[C>A]G       | 0            | 0.00490073 | 0.00363578 | 0.0188188    |
| C>A          | GCT           | G[C>A]T       | 0            | 0.01588711 | 0.01620633 | 0            |
| C>A          | TCA           | T[C>A]A       | 0.0209544    | 0.00838176 | 0.01554577 | 0.01341082   |
| C>A          | TCC           | T[C>A]C       | 0.00679162   | 0.00814995 | 0.01209266 | 0.00260798   |
| C>A          | TCG           | T[C>A]G       | 0            | 0          | 0.00306633 | 0.00529045   |
| C>A          | TCT           | T[C>A]T       | 0.01227203   | 0.02945287 | 0.02048499 | 0.00942492   |
| C>G          | ACA           | A[C>G]A       | 0            | 0.00396327 | 0.01029101 | 0.01014596   |
| C>G          | ACC           | A[C>G]C       | 0            | 0.00798616 | 0.00888723 | 0.01022229   |
| C>G          | ACG           | A[C>G]G       | 0.0138919    | 0.01667028 | 0          | 0.00266725   |
| C>G          | ACT           | A[C>G]T       | 0            | 0          | 0.00455325 | 0            |
| C>G          | CCA           | C[C>G]A       | 0            | 0          | 0.01192324 | 0.00257145   |
| C>G          | CCC           | C[C>G]C       | 0            | 0          | 0.00350236 | 0.00302137   |
| C>G          | CCG           | C[C>G]G       | 0.01710031   | 0          | 0.00380594 | 0.02298282   |
| C>G          | CCT           | C[C>G]T       | 0            | 0          | 0.00775033 | 0            |
| C>G          | GCA           | G[C>G]A       | 0            | 0.00426431 | 0.00790908 | 0            |
| C>G          | GCC           | G[C>G]C       | 0.02455844   | 0.0392935  | 0.02186346 | 0.00628696   |
| C>G          | GCG           | G[C>G]G       | 0.00816788   | 0          | 0          | 0            |
| C>G          | GCT           | G[C>G]T       | 0            | 0          | 0.01325972 | 0.0203355    |
| C>G          | TCA           | T[C>G]A       | 0.0139696    | 0.0209544  | 0.01088204 | 0.01072866   |
| C>G          | TCC           | T[C>G]C       | 0.01358325   | 0          | 0.00302317 | 0            |
| C>G          | TCG           | T[C>G]G       | 0            | 0          | 0.00306633 | 0            |
| C>G          | TCT           | T[C>G]T       | 0.01227203   | 0.01840804 | 0.012291   | 0.00235623   |
| C>T          | ACA           | A[C>T]A       | 0.00660544   | 0.0118898  | 0.0132313  | 0.03043788   |
| C>T          | ACC           | A[C>T]C       | 0.00665514   | 0.02795157 | 0.01333084 | 0.02300015   |
| C>T          | ACG           | A[C>T]G       | 0.0277838    | 0.06251356 | 0.01236744 | 0.04000868   |
| C>T          | ACT           | A[C>T]T       | 0.04091604   | 0.03273284 | 0.00910651 | 0.02618627   |
| C>T          | CCA           | C[C>T]A       | 0.02008942   | 0.00803577 | 0.00596162 | 0.01542867   |
| C>T          | CCC           | C[C>T]C       | 0.03147256   | 0.07553414 | 0.0157606  | 0.03625639   |
| C>T          | CCG           | C[C>T]G       | 0.0769514    | 0.06156112 | 0.03044754 | 0.03611586   |
| C>T          | CCT           | C[C>T]T       | 0.02785813   | 0.03342976 | 0.01550066 | 0.02406943   |

|     |     |         |            |            |            |            |
|-----|-----|---------|------------|------------|------------|------------|
| C>T | GCA | G[C>T]A | 0.08528623 | 0.04264311 | 0.02530905 | 0.03274991 |
| C>T | GCC | G[C>T]C | 0.04093073 | 0.01964675 | 0.02368542 | 0.0314348  |
| C>T | GCG | G[C>T]G | 0.04900729 | 0.02940438 | 0.02545047 | 0.0282282  |
| C>T | GCT | G[C>T]T | 0.00661963 | 0.01588711 | 0.02799275 | 0.0203355  |
| C>T | TCA | T[C>T]A | 0.0209544  | 0.02933617 | 0.02176408 | 0.02145731 |
| C>T | TCC | T[C>T]C | 0.0271665  | 0.02037487 | 0.01360424 | 0.0156479  |
| C>T | TCG | T[C>T]G | 0.04133162 | 0.01239949 | 0.00766583 | 0.02909746 |
| C>T | TCT | T[C>T]T | 0.00613601 | 0.01840804 | 0.03004465 | 0.03063098 |
| T>A | ATA | A[T>A]A | 0          | 0          | 0.00299154 | 0.0025807  |
| T>A | ATC | A[T>A]C | 0          | 0          | 0.00768396 | 0.00265148 |
| T>A | ATG | A[T>A]G | 0.00665144 | 0.00399087 | 0.01628422 | 0.00766246 |
| T>A | ATT | A[T>A]T | 0.00741945 | 0.01335501 | 0.00495395 | 0          |
| T>A | CTA | C[T>A]A | 0          | 0          | 0.00883175 | 0.00253962 |
| T>A | CTC | C[T>A]C | 0.0133791  | 0.01605492 | 0.01042205 | 0.00256879 |
| T>A | CTG | C[T>A]G | 0          | 0.01235209 | 0.01832767 | 0.00263511 |
| T>A | CTT | C[T>A]T | 0.0192489  | 0          | 0.0028561  | 0.00985544 |
| T>A | GTA | G[T>A]A | 0          | 0          | 0.00147327 | 0.00254187 |
| T>A | GTC | G[T>A]C | 0          | 0.00386264 | 0.00429846 | 0          |
| T>A | GTG | G[T>A]G | 0.00656562 | 0.00393937 | 0.01022897 | 0.0025212  |
| T>A | GTT | G[T>A]T | 0.00670725 | 0          | 0.00149281 | 0          |
| T>A | TTA | T[T>A]A | 0          | 0.00431221 | 0.00159958 | 0.00827944 |
| T>A | TTC | T[T>A]C | 0.00689588 | 0          | 0.0107435  | 0.01324009 |
| T>A | TTG | T[T>A]G | 0          | 0.0039669  | 0.01324342 | 0          |
| T>A | TTT | T[T>A]T | 0          | 0          | 0.00664884 | 0          |
| T>C | ATA | A[T>C]A | 0.00672057 | 0          | 0.01794921 | 0.00774209 |
| T>C | ATC | A[T>C]C | 0          | 0.00414294 | 0.01229434 | 0.00795443 |
| T>C | ATG | A[T>C]G | 0.01330289 | 0.0119726  | 0.02368613 | 0.00255415 |
| T>C | ATT | A[T>C]T | 0.0148389  | 0.00445167 | 0.00825658 | 0.01424534 |
| T>C | CTA | C[T>C]A | 0.00661359 | 0.01190446 | 0.01177567 | 0.01015848 |
| T>C | CTC | C[T>C]C | 0.00668955 | 0.00401373 | 0.00744432 | 0.01027515 |
| T>C | CTG | C[T>C]G | 0.01372454 | 0.01646945 | 0.00763653 | 0.02635112 |
| T>C | CTT | C[T>C]T | 0          | 0.00769956 | 0.00571219 | 0.01724701 |
| T>C | GTA | G[T>C]A | 0          | 0          | 0.00883959 | 0.00762562 |
| T>C | GTC | G[T>C]C | 0.00643773 | 0          | 0.01146255 | 0.01483254 |
| T>C | GTG | G[T>C]G | 0.00656562 | 0.01181812 | 0.00730641 | 0.02773318 |
| T>C | GTT | G[T>C]T | 0.01341451 | 0          | 0.00298561 | 0.0180291  |
| T>C | TTA | T[T>C]A | 0          | 0          | 0.01119707 | 0.01103925 |
| T>C | TTC | T[T>C]C | 0.02758352 | 0.02482517 | 0.00767393 | 0.01324009 |
| T>C | TTG | T[T>C]G | 0.00661149 | 0.0039669  | 0.01030044 | 0.01269406 |
| T>C | TTT | T[T>C]T | 0.0074684  | 0.00448104 | 0.00997326 | 0.01433933 |
| T>G | ATA | A[T>G]A | 0          | 0          | 0.0044873  | 0          |

|     |     |         |            |            |            |            |
|-----|-----|---------|------------|------------|------------|------------|
| T>G | ATC | A[T>G]C | 0.00690489 | 0.00828587 | 0.00307358 | 0.00795443 |
| T>G | ATG | A[T>G]G | 0.00665144 | 0.00399087 | 0.00296077 | 0          |
| T>G | ATT | A[T>G]T | 0          | 0          | 0          | 0          |
| T>G | CTA | C[T>G]A | 0          | 0          | 0          | 0          |
| T>G | CTC | C[T>G]C | 0          | 0          | 0          | 0.00770636 |
| T>G | CTG | C[T>G]G | 0.00686227 | 0.00411736 | 0          | 0          |
| T>G | CTT | C[T>G]T | 0.0064163  | 0          | 0.00142805 | 0.00246386 |
| T>G | GTA | G[T>G]A | 0          | 0          | 0          | 0          |
| T>G | GTC | G[T>G]C | 0          | 0          | 0.00429846 | 0          |
| T>G | GTG | G[T>G]G | 0          | 0.00393937 | 0          | 0.01260599 |
| T>G | GTT | G[T>G]T | 0          | 0          | 0          | 0.00515117 |
| T>G | TTA | T[T>G]A | 0          | 0          | 0.00159958 | 0.01379906 |
| T>G | TTC | T[T>G]C | 0          | 0          | 0.00460436 | 0.00264802 |
| T>G | TTG | T[T>G]G | 0          | 0.00793379 | 0.00147149 | 0          |
| T>G | TTT | T[T>G]T | 0.0074684  | 0.00448104 | 0.00498663 | 0.00573573 |

| FFPE.GBE   | FFPE.MEG   |
|------------|------------|
| 0.00930708 | 0.01627943 |
| 0.00562626 | 0.00937251 |
| 0.00195737 | 0.00733655 |
| 0.00384339 | 0.01920753 |
| 0.01509655 | 0.02947103 |
| 0.02438969 | 0.03047221 |
| 0.00722831 | 0.00752581 |
| 0.01570087 | 0.01103427 |
| 0.00200281 | 0.008758   |
| 0.00230686 | 0.01152866 |
| 0.02531884 | 0.00718933 |
| 0.00746166 | 0.00932251 |
| 0.00787328 | 0.01106639 |
| 0.01339718 | 0.00836914 |
| 0.00970605 | 0.00485065 |
| 0.00691652 | 0.01188196 |
| 0.01675274 | 0.00930253 |
| 0.0093771  | 0.00585782 |
| 0.00978686 | 0.00489104 |
| 0.00192169 | 0.00720282 |
| 0.00377414 | 0.01060957 |
| 0.01108622 | 0.0069255  |
| 0.02168493 | 0.01505162 |
| 0.00196261 | 0.01103427 |
| 0.00400562 | 0.00625571 |
| 0.0115343  | 0.0158519  |
| 0          | 0          |
| 0.01865414 | 0.02097565 |
| 0.00590496 | 0.01106639 |
| 0.00191388 | 0.00119559 |
| 0          | 0.00242533 |
| 0.00691652 | 0.00972161 |
| 0.02978266 | 0.01511661 |
| 0.0187542  | 0.01288721 |
| 0.06263589 | 0.0269007  |
| 0.03266878 | 0.02160847 |
| 0.00754828 | 0.00707305 |
| 0.05099663 | 0.02077651 |
| 0.04096043 | 0.04063937 |
| 0.01570087 | 0.01961648 |



|            |            |
|------------|------------|
| 0.01401965 | 0.02001828 |
| 0.03690975 | 0.02593948 |
| 0.02531884 | 0.01006507 |
| 0.02238497 | 0.01981033 |
| 0.02558816 | 0.01967357 |
| 0.03062212 | 0.01554269 |
| 0.02329453 | 0.01576463 |
| 0.03112436 | 0.03240535 |
| 0.00378772 | 0.00236617 |
| 0.0019458  | 0.00729319 |
| 0.00749752 | 0.0163928  |
| 0.01045402 | 0.00522445 |
| 0.00186371 | 0.00349275 |
| 0.00188512 | 0.00588811 |
| 0.00386758 | 0.01328831 |
| 0.00542435 | 0.00338856 |
| 0          | 0.00233057 |
| 0.00181416 | 0.00226659 |
| 0.00185019 | 0.01040225 |
| 0.00189011 | 0          |
| 0.0020253  | 0.0012652  |
| 0.00971631 | 0.00849761 |
| 0.00186312 | 0.01513046 |
| 0.0042092  | 0.00262946 |
| 0.00946929 | 0.0272109  |
| 0.0019458  | 0.01093978 |
| 0.00562314 | 0.0163928  |
| 0.01045402 | 0.00783668 |
| 0.00745485 | 0.01164251 |
| 0.01696606 | 0.01177622 |
| 0.01933791 | 0.01932845 |
| 0.01265681 | 0.0112952  |
| 0.00373073 | 0.01048756 |
| 0.00907078 | 0.01019964 |
| 0.02405253 | 0.01733709 |
| 0.00945053 | 0.0059037  |
| 0.01012651 | 0.01518234 |
| 0.00971631 | 0.00728367 |
| 0.00931561 | 0.01280269 |
| 0.0021046  | 0.00262946 |
| 0          | 0.0070985  |

|            |            |
|------------|------------|
| 0.0058374  | 0.00243106 |
| 0.00374876 | 0.00117091 |
| 0.0020908  | 0.00261223 |
| 0          | 0          |
| 0.00754047 | 0.00471049 |
| 0          | 0.00120803 |
| 0.00180812 | 0.00112952 |
| 0          | 0          |
| 0          | 0.00339988 |
| 0.00185019 | 0.00231161 |
| 0.00567032 | 0          |
| 0.01215181 | 0.00759117 |
| 0.00194326 | 0.00364183 |
| 0          | 0.00116388 |
| 0.0021046  | 0.00262946 |

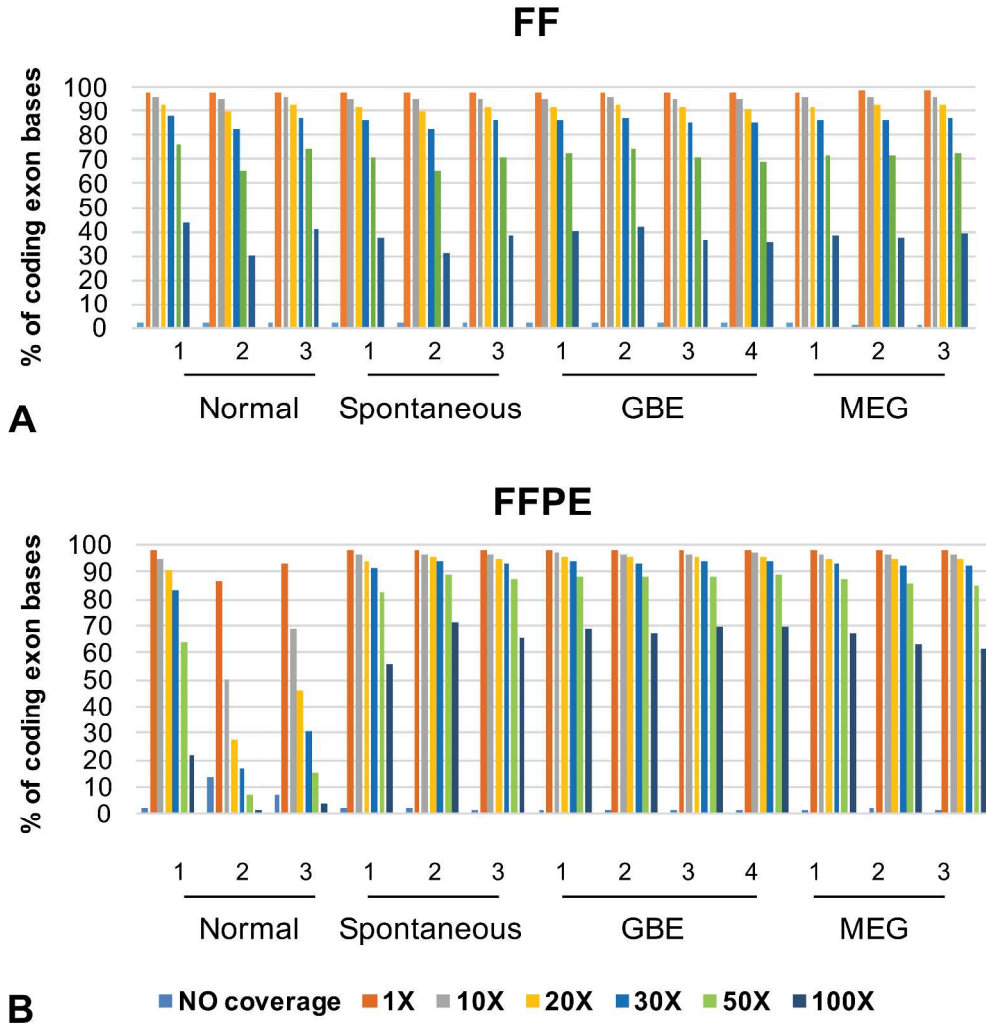

Supplementary Figure 1-Depth of coverage for FF and FFPE samples

132x134mm (1200 x 1200 DPI)

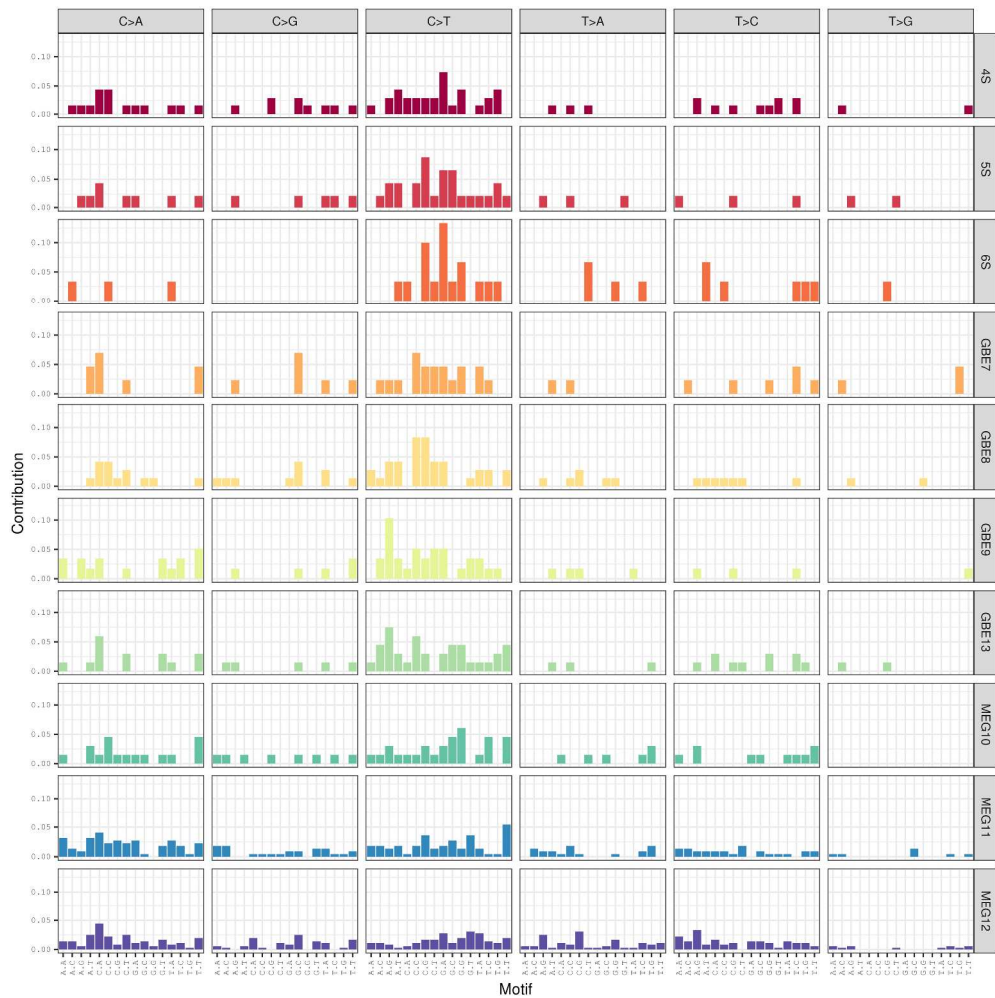

Supplementary figure 2 - Mutation spectra for the fresh frozen (FF-2a) and formalin fixed paraffin embedded (FFPE-2b) hepatocellular carcinomas arising spontaneously or due to exposure to ginkgo biloba extract or methyleugenol. The corresponding mutation counts for each tumor type (fresh frozen (FF) and formalin fixed paraffin embedded (FFPE)) are indicated in Supplementary table 6 (a and b).

187x187mm (508 x 508 DPI)

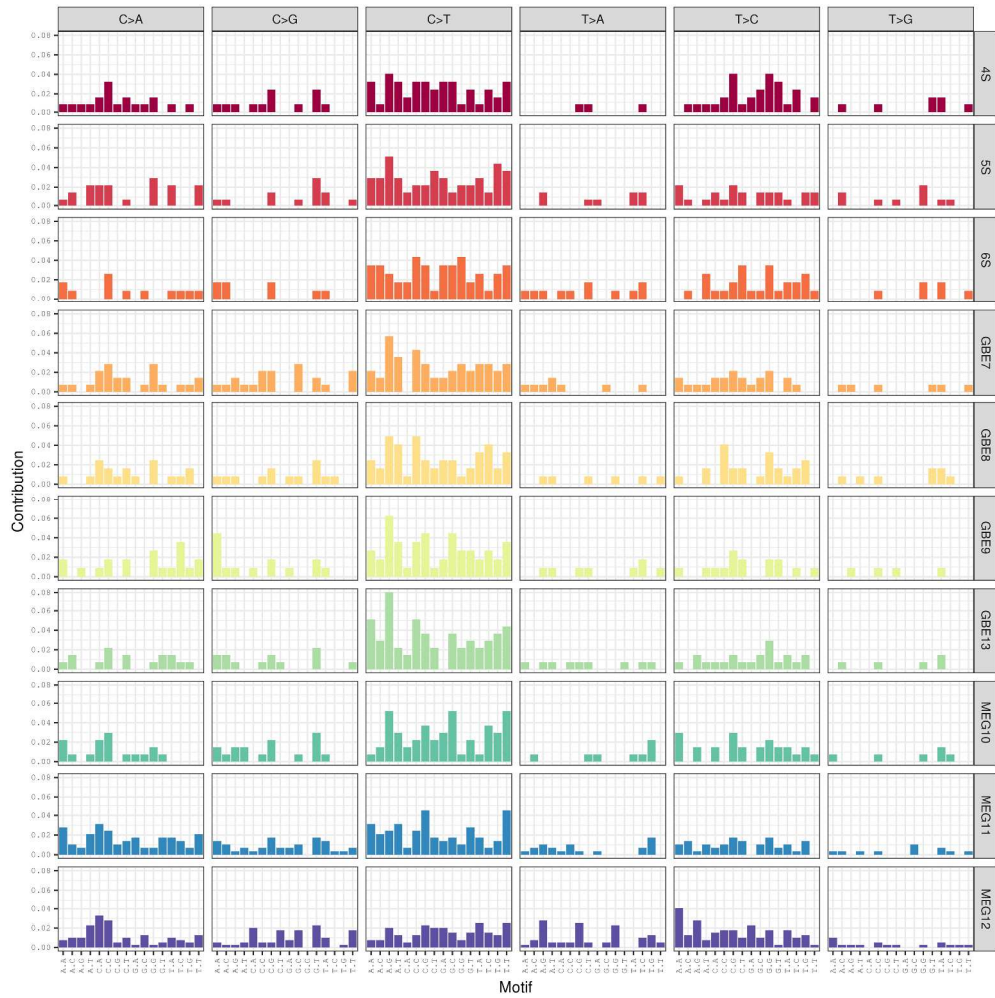

Supplementary figure 2 - Mutation spectra for the fresh frozen (FF-2a) and formalin fixed paraffin embedded (FFPE-2b) hepatocellular carcinomas arising spontaneously or due to exposure to ginkgo biloba extract or methyleugenol. The corresponding mutation counts for each tumor type (fresh frozen (FF) and formalin fixed paraffin embedded (FFPE)) are indicated in Supplementary table 6 (a and b).

187x187mm (508 x 508 DPI)
